# Supplementary material for: A simple, rational synthesis of meso-substituted A2B-corroles
Source: Royal Society of Chemistry journal article supplement (doi:10.1039/b006734m), 2000-01-01
Supplement: b006734m.doc [file b006734m.doc]

**Supporting information**

**General experimental section**. All chemicals were used as received unless otherwise noted. Reagent grade solvents (CH2Cl2, hexanes) were distilled prior use. All reported 1H NMR spectra were collected in CDCl3 (Bruker AM500). UV-Vis absorption spectra were recorded in toluene (Cary). Chromatography was performed on silica (Kieselgel 60, 200-400 mesh). Mass spectra experiments were performed on an Mariner instrument using electrospray ionization technique (ESI-MS).

**10-(2,6-Difluorophenyl)-5,15-dimesitylcorrole (3)**. Aldehyde **2** (86 L, 0.80 mmol) was added to CH2Cl2 (3 mL) followed by mesityldipyrromethane **1** (210 mg, 0.80 mmol). The reaction mixture was stirred at room temperature for 2 h. Then DDQ (180 mg, 0.80 mmol) in toluene (2 mL) was added. The resulting mixture was passed over a column (silica, CH2Cl2/hexanes, 1:1) affording corrole **3** contaminated with small amount of less polar dark-green compound. Subsequent chromatography (silica, CH2Cl2/hexanes, 4:6) afforded pure corrole (48 mg, 19%) as a violet solid. 1H NMR  1.60 (bs, 3H), 1.95 (s, 12H), 2.61 (s, 6H), 7.28 (s, 4H), 7.30-7.38 (m, 2H), 7.66-7.74 (m, 1H), 8.31 (d, *J* = 3.9Hz, 2H), 8.37-8.42 (m, 2H), 8.49-8.54 (m, 2H), 8.85 (d, *J* = 4.1Hz, 2H); ESI-MS obsd 647.3 [M+H+]; ESI-HR obsd 647.3000 [M+H+], calcd exact mass 647.2981 (C43H37F2N4); Anal. Calcd for C43H37F2N4: C, 79.85; H, 5.61; N, 8.66. Found: C, 79.57; H, 5.83; N, 8.49; abs (toluene,   103) 408 (138), 424 (112), 566 (21.5), 598 (11.5), 632 (4.0) nm.

**10-(2,6-Difluorophenyl)-5,15-diphenylcorrole (10)**. Aldehyde **2** (86 L, 0.80 mmol) was added to CH2Cl2 (3 mL) followed by phenyldipyrromethane **4** (177 mg, 0.80 mmol). The reaction mixture was stirred at room temperature for 2 h. Then DDQ (180 mg, 0.80 mmol) in toluene (2 mL) was added. The resulting mixture was passed over a column (silica, CH2Cl2/hexanes, 1:1) affording corrole **10** contaminated with small amount of a few mostly green compounds. Subsequent chromatography (silica, CH2Cl2/hexanes, 4:6) afforded pure corrole (20 mg, 9%) as a violet solid. 1H NMR  1.79 (bs, 3H), 8.2-8.5 (bs, 2H), 7.5-8.0 (bs, 7H), 8.1-8.7 (bs, 8H), 8.7-9.2 (bs, 4H); ESI-MS obsd 563.2 [M+H+]; ESI-HR obsd 563.2067 [M+H+], calcd exact mass 563.2042 (C37H25F2N4); abs (toluene) 416, 577, 606, 643 nm.

**10-(2,4-Difluorophenyl)-5,15-dimesitylcorrole (11)**. Aldehyde **6** (86 L, 0.80 mmol) was added to CH2Cl2 (3 mL) followed by mesityldipyrromethane **1** (210 mg, 0.80 mmol). The reaction mixture was stirred at room temperature for 5 h. Then DDQ (180 mg, 0.80 mmol) in toluene (2 mL) was added. The resulting mixture was passed over a column (silica, CH2Cl2/hexanes, 1:1) affording corrole **11** contaminated with small amount of less polar dark-green compound. Subsequent chromatography (silica, CH2Cl2/hexanes, 4:6) afforded pure corrole (11 mg, 4%) as a violet solid. 1H NMR  1.79 (bs, 3H), 1.91 (s, 6H), 1.92 (s, 6H), 2.59 (s, 6H), 7.18-7.28 (m, 6H), 7.97-8.06 (m, 1H), 8.30 (d, *J* = 3.9Hz, 2H), 8.34-8.38 (m, 2H), 8.47-8.50 (m, 2H), 8.85 (d, *J* = 4.1Hz, 2H); ESI-MS obsd 647.3 [M+H+]; ESI-HR obsd 647.2995 [M+H+], calcd exact mass 647.2981 (C43H37F2N4); abs (toluene) 408, 425, 567, 601, 634 nm.

**5,15-Dimesityl-10-(2,3,6-trifluorophenyl)-corrole (12)**. Aldehyde **8** (89 L, 0.80 mmol) was added to CH2Cl2 (3 mL) followed by mesityldipyrromethane **1** (210 mg, 0.80 mmol). The reaction mixture was stirred at room temperature for 2 h. Then DDQ (180 mg, 0.80 mmol) in toluene (2 mL) was added. The resulting mixture was passed over a silica column (silica, CH2Cl2/hexanes, 1:1) affording corrole **12** contaminated with small amount of less polar dark-green compound. Subsequent chromatography (silica, CH2Cl2/hexanes, 4:6) afforded pure corrole (27 mg, 10%) as a violet solid. 1H NMR  1.62 (bs, 3H), 1.91 (s, 12H), 2.58 (s, 6H), 7.20-7.28 (m, 5H), 7.48-7.57 (m, 1H), 8.27 (d, *J* = 3.9Hz, 2H), 8.33-8.37 (m, 2H), 8.47-8.51 (m, 2H), 8.81 (d, *J* = 4.1Hz, 2H); ESI-MS obsd 665.3 [M+H+]; ESI-HR obsd 665.2923 [M+H+], calcd exact mass 665.2887 (Cx43H36F3N4); abs (toluene) 408, 425, 565, 597, 631 nm.

**5,15-Dimesityl-10-(pentafluorophenyl)-corrole (13)**. Aldehyde **9** (96 L, 0.80 mmol) was added to CH2Cl2 (3 mL) followed by mesityldipyrromethane **1** (210 mg, 0.80 mmol). The reaction mixture was stirred at room temperature for 2 h. Then DDQ (180 mg, 0.80 mmol) in toluene (2 mL) was added. The resulting mixture was passed over a silica column (silica, CH2Cl2/hexanes, 1:1) affording corrole **13** contaminated with respective porphyrin and a few unidentified compounds. Two subsequent chromatographies (silica, CH2Cl2/hexanes, 4:6) afforded pure 1,15-dimesityl-10,20-bis-(pentafluorphenyl)porphyrin (4 mg, 1%, spectral and physical properties concur with published data15) and pure corrole (23 mg, 8%) as a violet solid. 1H NMR  1.71 (bs, 3H), 1.92 (s, 12H), 2.59 (s, 6H), 7.26 (s, 4H), 8.25-8.35 (m, 4H), 8.52 (d, *J* = 4.7Hz, 2H), 8.83 (d, *J* = 4.1Hz, 2H); ESI-MS obsd 701.3 [M+H+]; ESI-HR obsd 701.2679 [M+H+], calcd exact mass 701.2698 (C43H34F5N4); abs (toluene) 408, 425, 565, 596, 631 nm.
